10. Näsell H, Adami J, Samnegård E, Tønnesen H, Ponzer S: Effect of smoking cessation intervention on results of acute fracture surgery: A randomized controlled trial. *J Bone Joint Surg* 2010; 92:1335–42
11. Tønnesen H, Faurschou P, Ralov H, Mølgaard-Nielsen D, Thomas G, Backer V: Risk reduction before surgery. The role of the primary care provider in smoking and alcohol cessation. *BMC Health Serv Res* 2010; 10:121
12. Willaing I, Jørgensen T, Iversen L: How does individual smoking behaviour among hospital staff influence their knowledge of the health consequences of smoking? *Scand J Public Health* 2003; 31:149–55
13. Lindström D, Sundberg-Petersson I, Adami J, Tønnesen H: Disappointment and drop-out rate after being allocated to control group in a smoking cessation trial. *Contemp Clin Trials* 2010; 31:22–6

## ANESTHESIOLOGY REFLECTIONS

### The Cooper-Dennis “Process for Administering Anaesthetics”

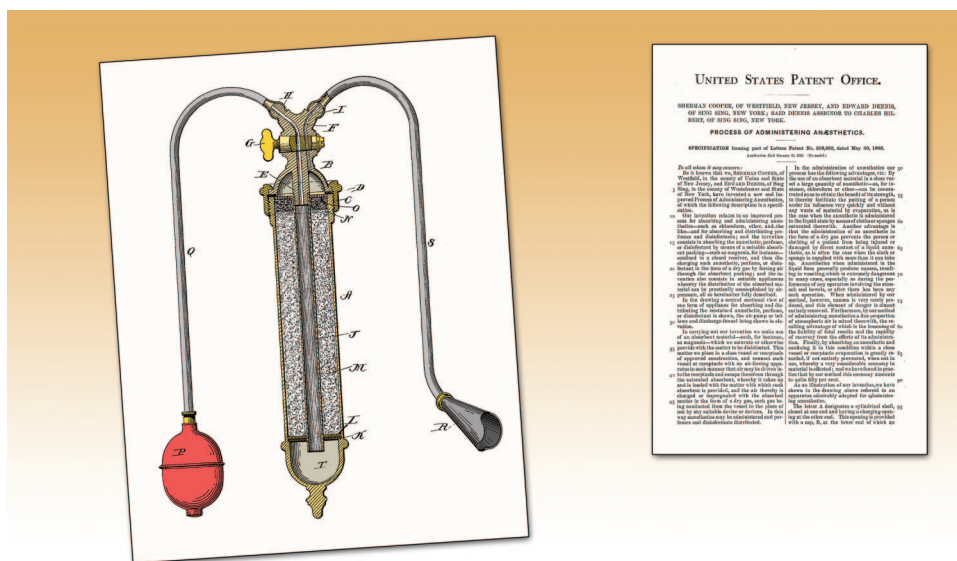

In January of 1882, Sherman Cooper of New Jersey and Edward Dennis of New York filed a U.S. patent application for their “Process for Administering Anaesthetics.” According to their application “absorbent packing . . . such as magnesia” was saturated with ether or chloroform prior to forcing air through the closed container by a rubber “bulb or other air forcing device” (*left*). Their U.S. Patent No. 258,632 claimed many advantages for their process, including greater economy and swifter onset of anesthesia, less nausea and clothing damage, and fewer injuries and fatalities. Perhaps more confident in their entrepreneurship than in their “anaesthetic process,” Cooper and Dennis hedged their patent filing by noting its potential use in applying perfumes. (Copyright © the American Society of Anesthesiologists, Inc. This image also appears in the *Anesthesiology Reflections* online collection available at [www.anesthesiology.org](http://www.anesthesiology.org).)

George S. Bause, M.D., M.P.H., Honorary Curator, ASA’s Wood Library-Museum of Anesthesiology, Park Ridge, Illinois, and Clinical Associate Professor, Case Western Reserve University, Cleveland, Ohio. [UJYC@aol.com](mailto:UJYC@aol.com).
